# Supplementary figures and images for: Human-specific ARHGAP11B induces hallmarks of neocortical expansion in developing ferret neocortex
Source: eLife journal article supplement (doi:10.7554/elife.41241), 2018-11-28

Figure 1 supplement 1

A

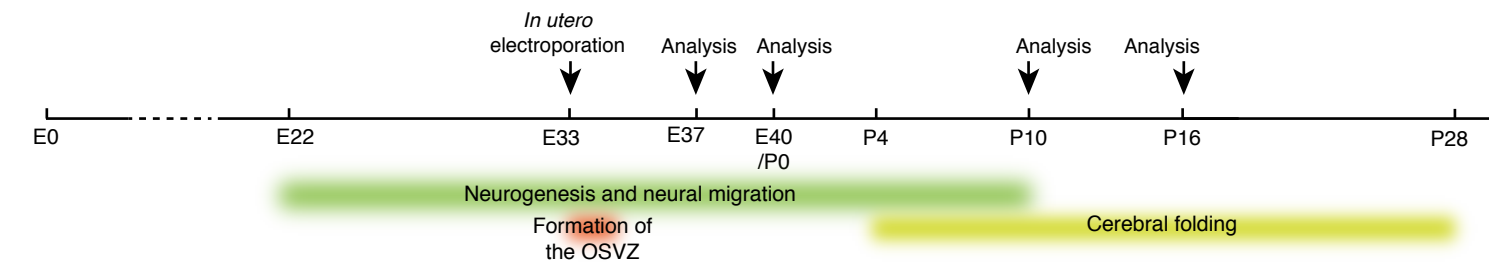

B

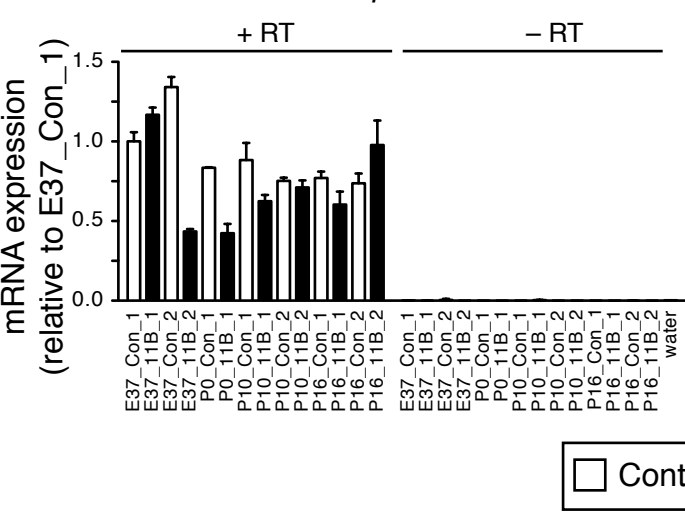

C

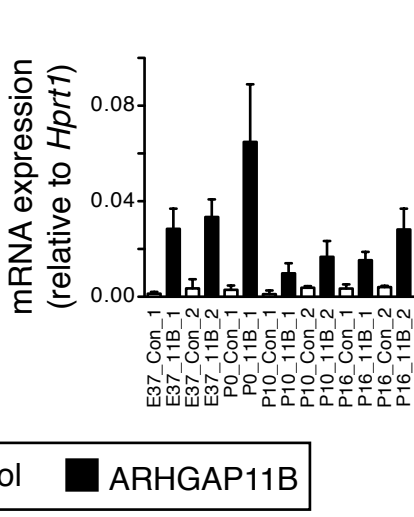

D

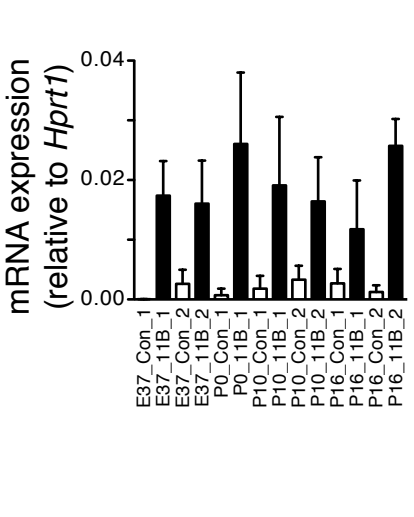

E

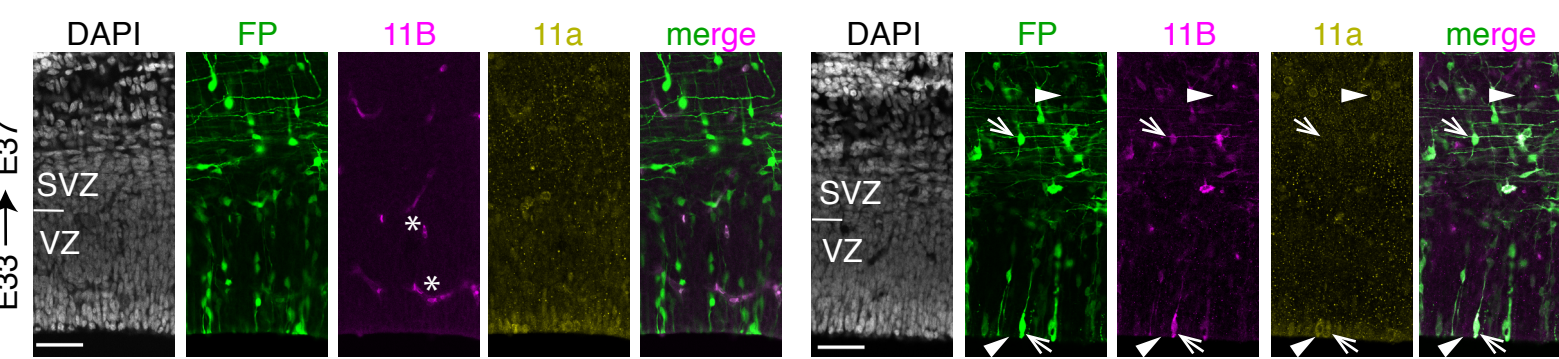

F

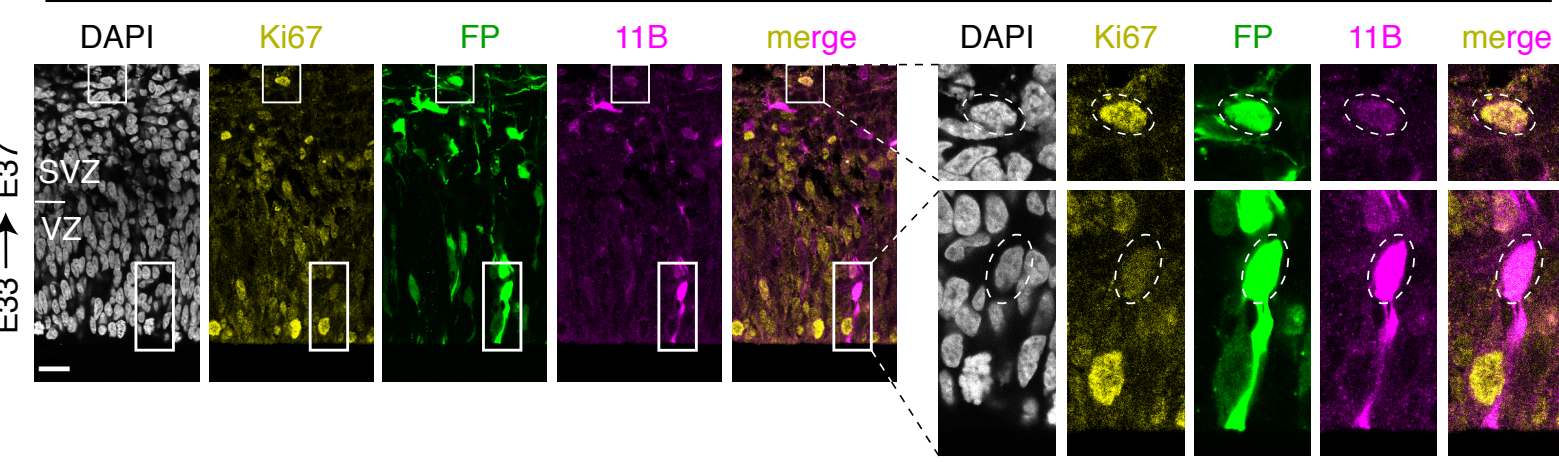

Supplement: supp [file elife_poa_e41241_Figure_1_figure_supplement_1.pdf › elife_poa_e41241_Figure_1_figure_supplement_1.pdf]

Figure 1 supplement 2

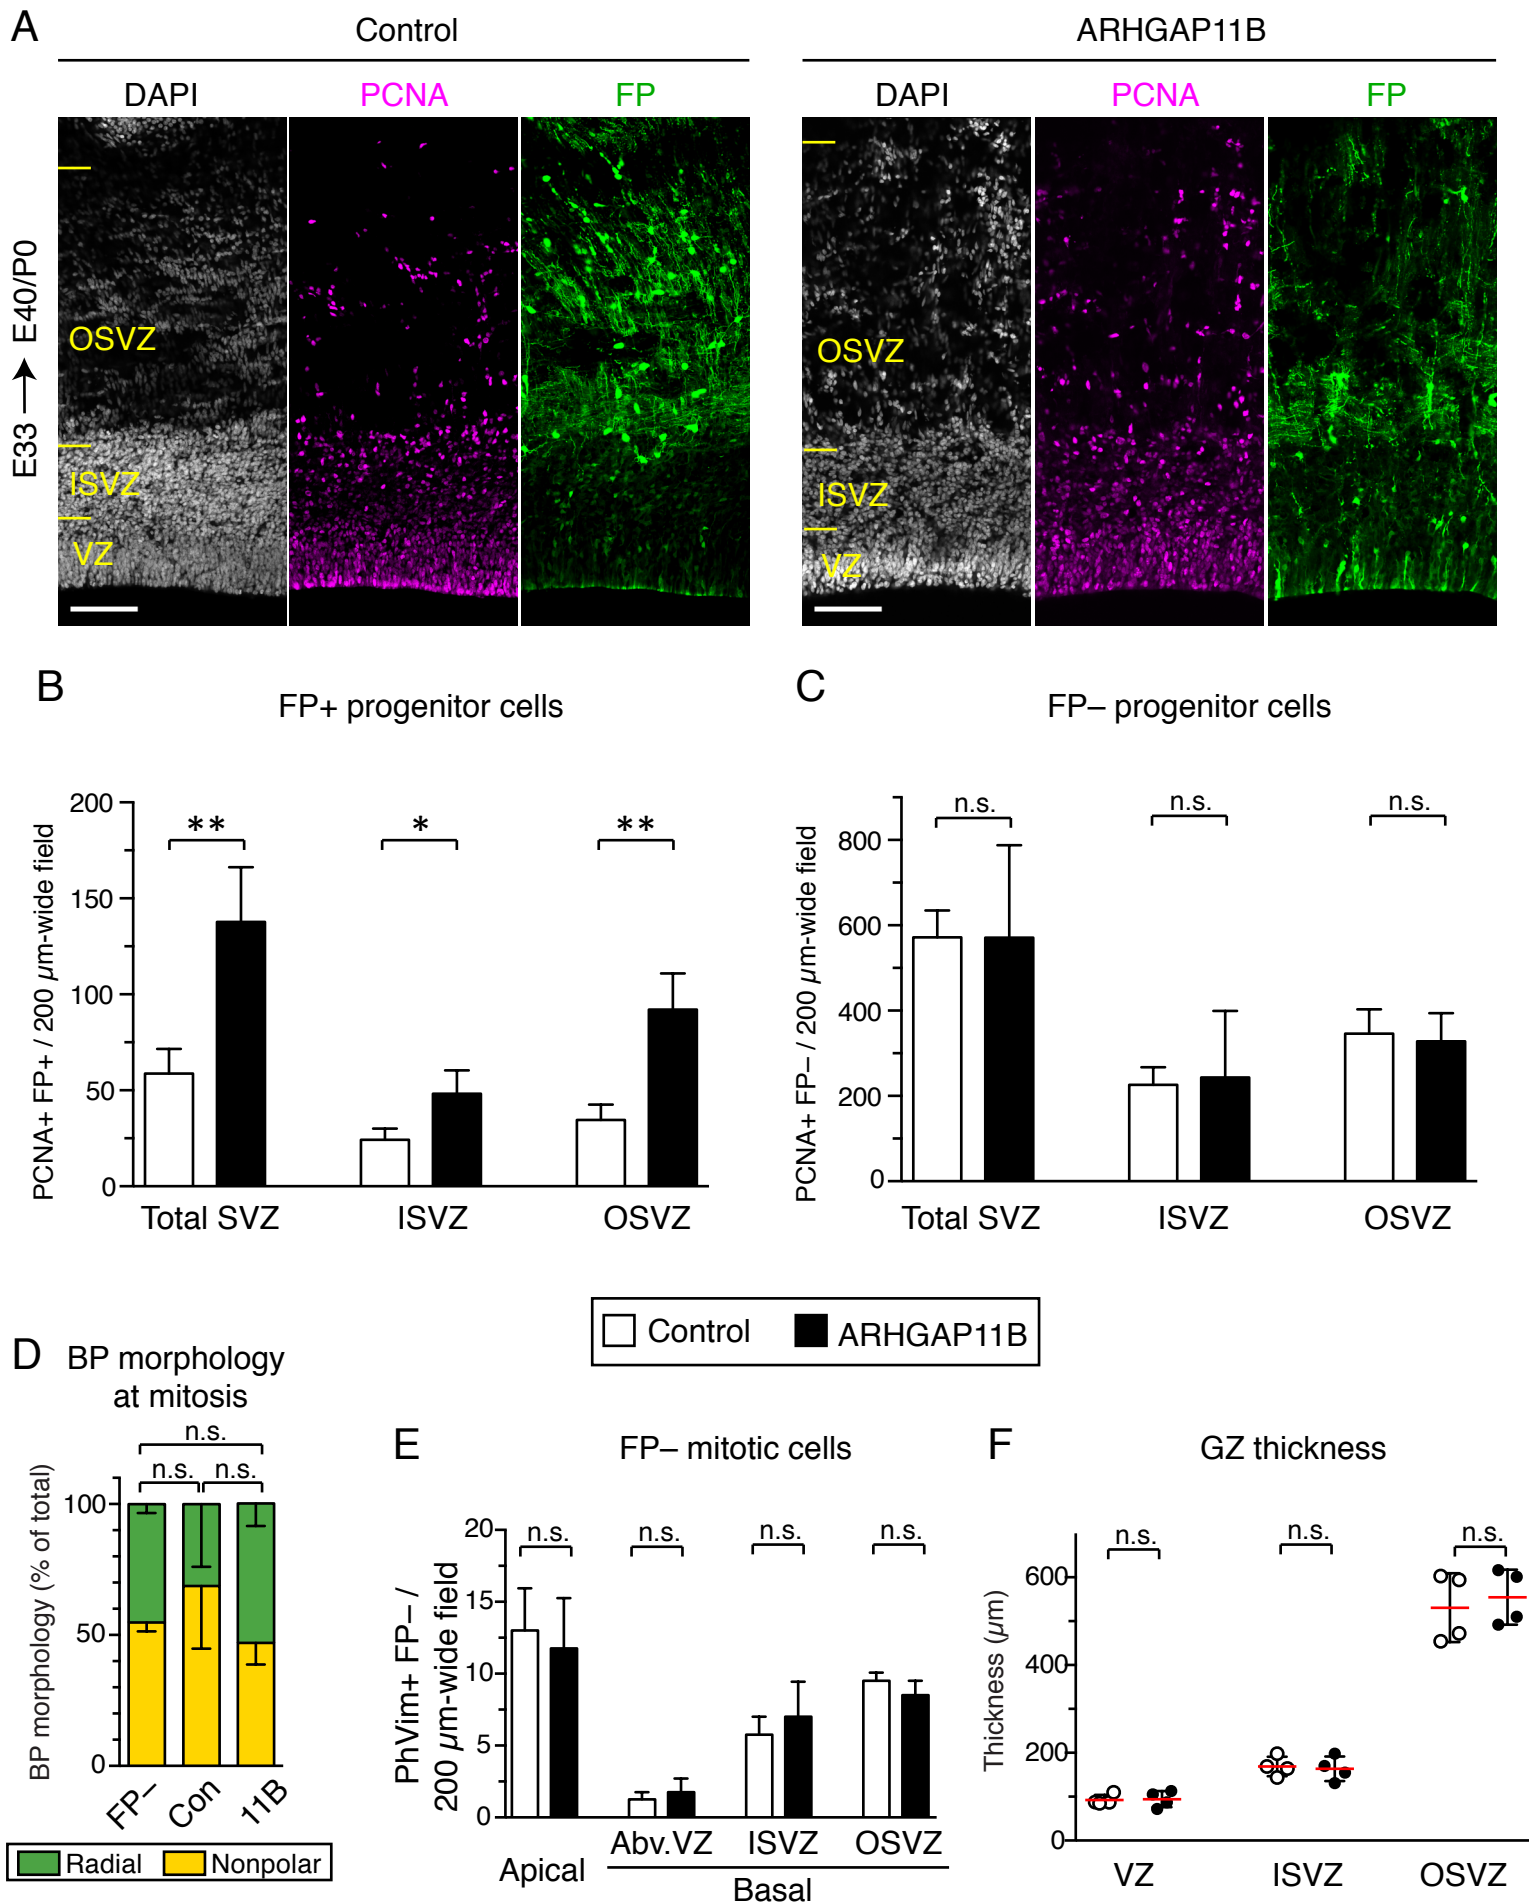

Supplement: supp [file elife_poa_e41241_Figure_1_figure_supplement_2.pdf › elife_poa_e41241_Figure_1_figure_supplement_2.pdf]

Figure 2 supplement 1

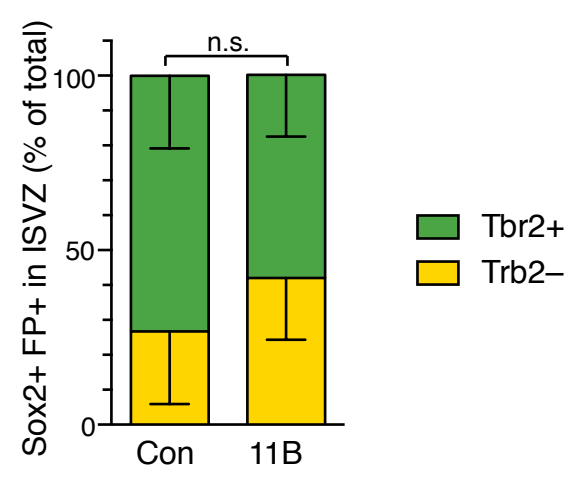

Supplement: supp [file elife_poa_e41241_Figure_2_figure_supplement_1.pdf › elife_poa_e41241_Figure_2_figure_supplement_1.pdf]

Figure 3 supplement 1

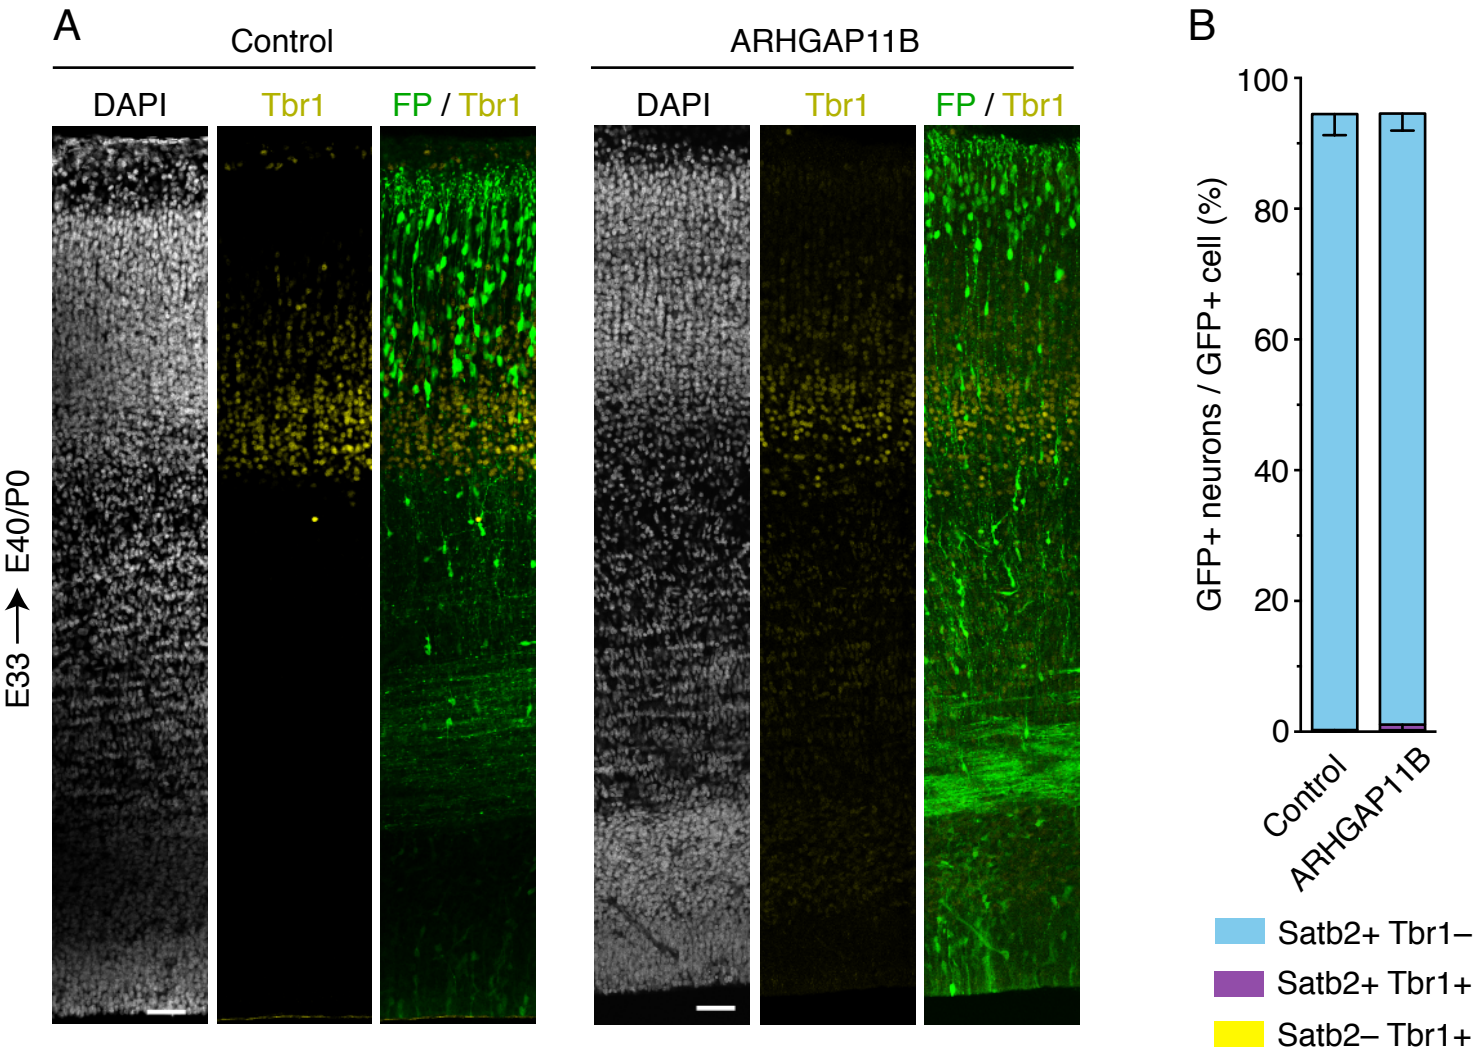

Supplement: supp [file elife_poa_e41241_Figure_3_figure_supplement_1.pdf › elife_poa_e41241_Figure_3_figure_supplement_1.pdf]

Figure 3 supplement 2

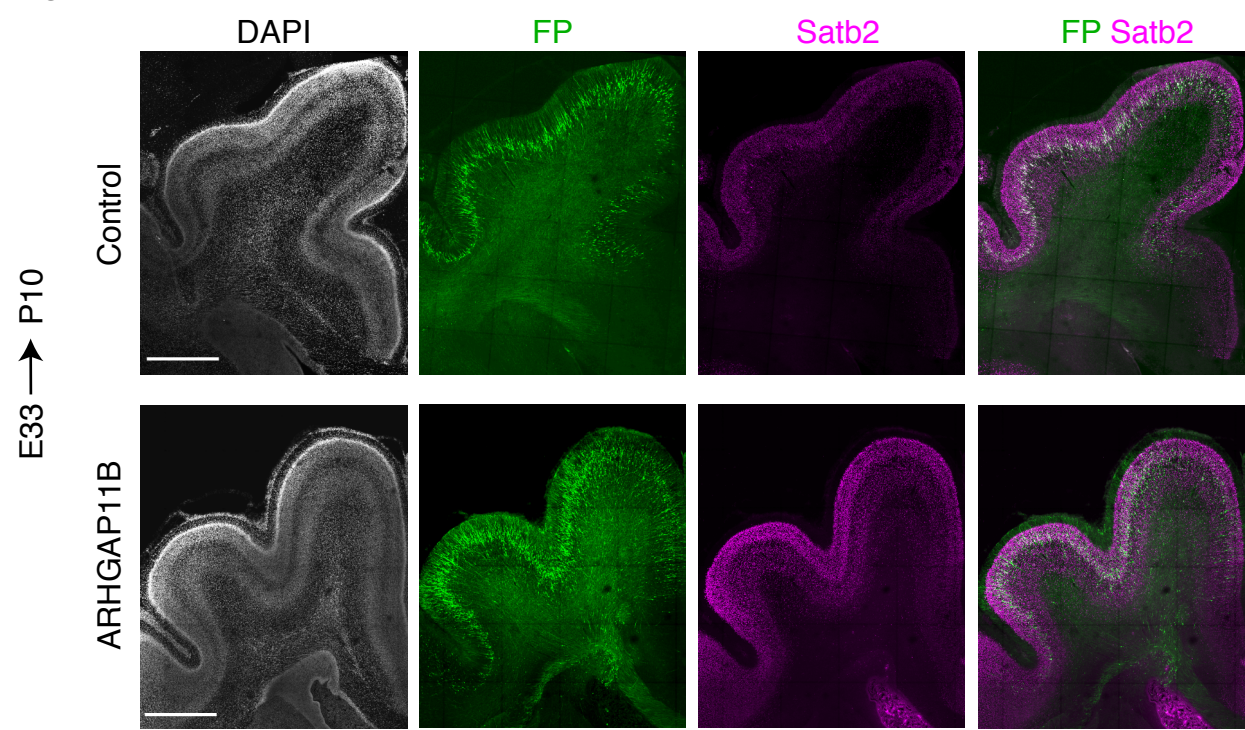

Supplement: supp [file elife_poa_e41241_Figure_3_figure_supplement_2.pdf › elife_poa_e41241_Figure_3_figure_supplement_2.pdf]

Figure 4 supplement 1

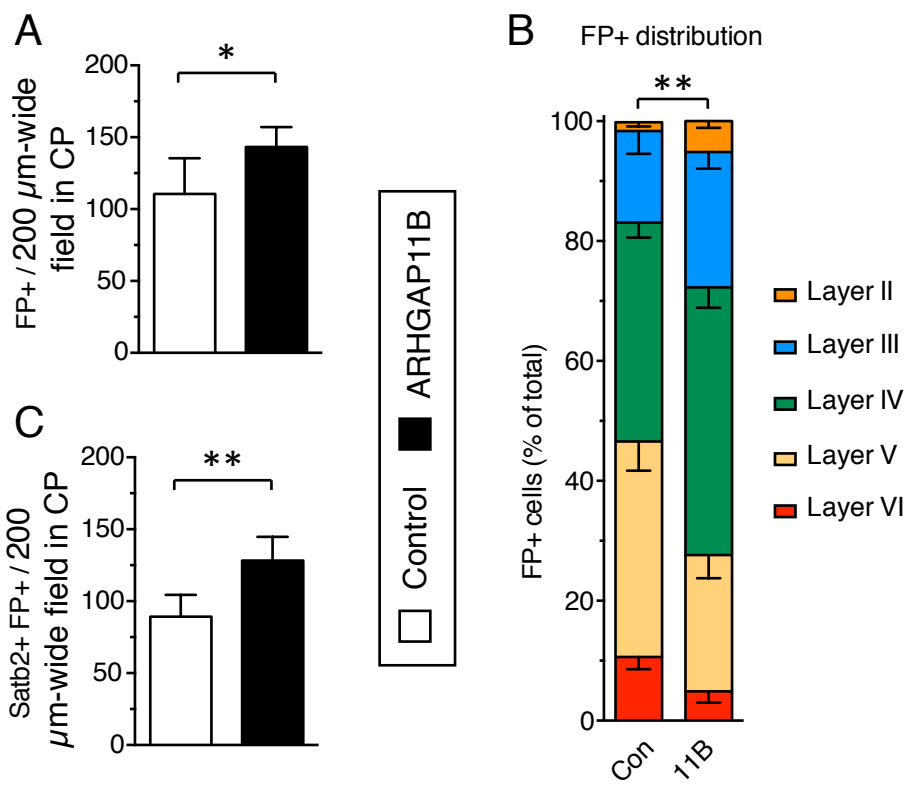

Supplement: supp [file elife_poa_e41241_Figure_4_figure_supplement_1.pdf › elife_poa_e41241_Figure_4_figure_supplement_1.pdf]

Figure 4 supplement 2

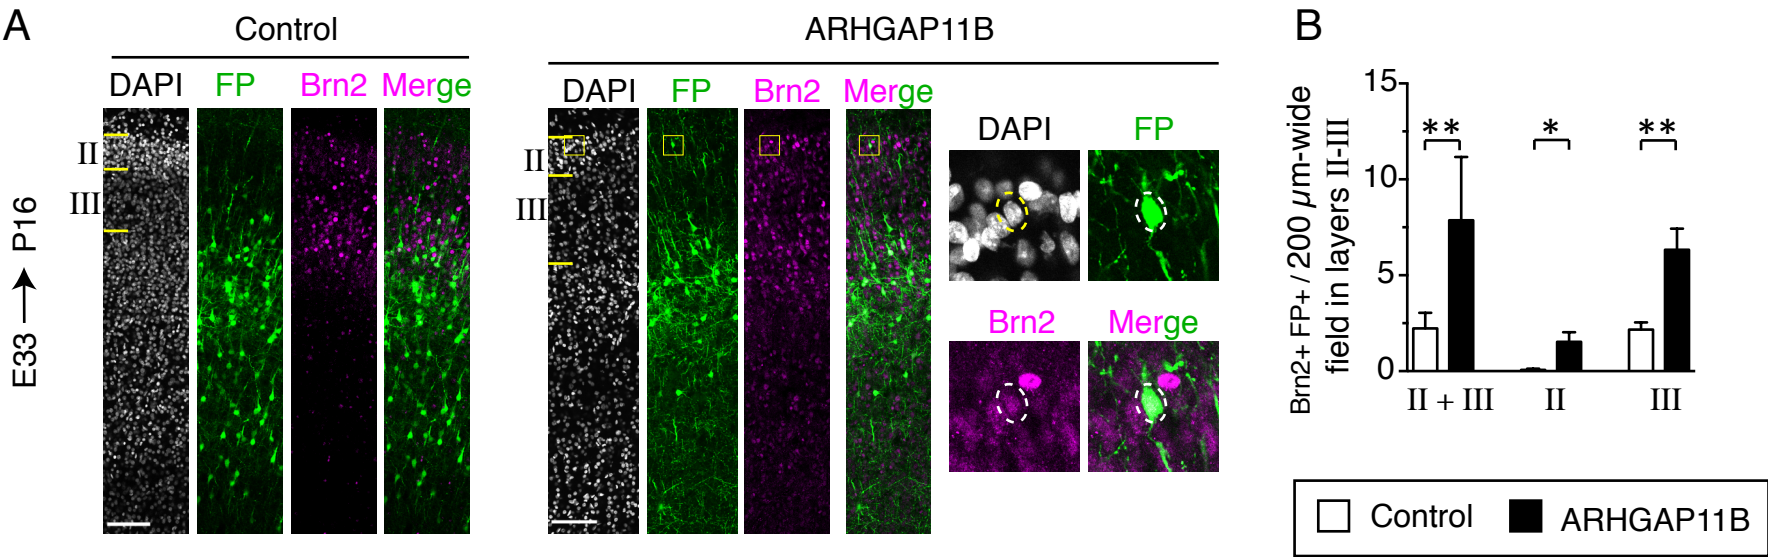

Supplement: supp [file elife_poa_e41241_Figure_4_figure_supplement_2.pdf › elife_poa_e41241_Figure_4_figure_supplement_2.pdf]

Figure 4 supplement 3

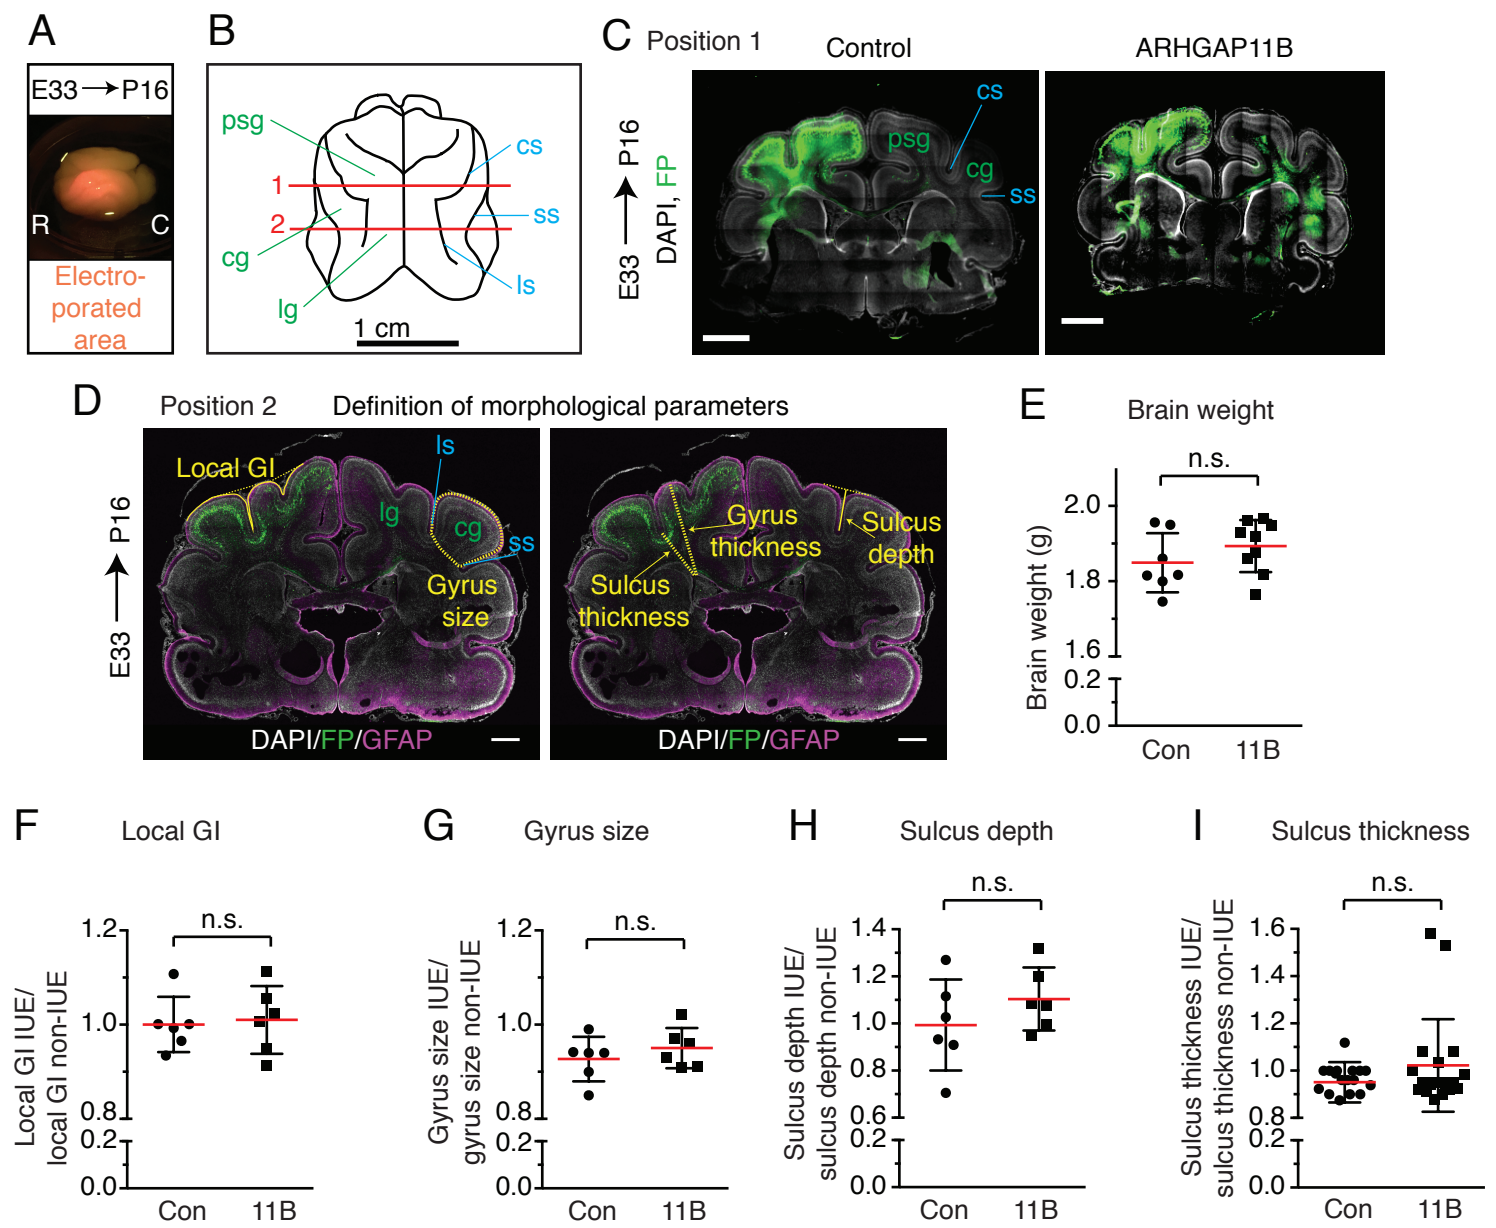

Supplement: supp [file elife_poa_e41241_Figure_4_figure_supplement_3.pdf › elife_poa_e41241_Figure_4_figure_supplement_3.pdf]

Figure 4 supplement 4

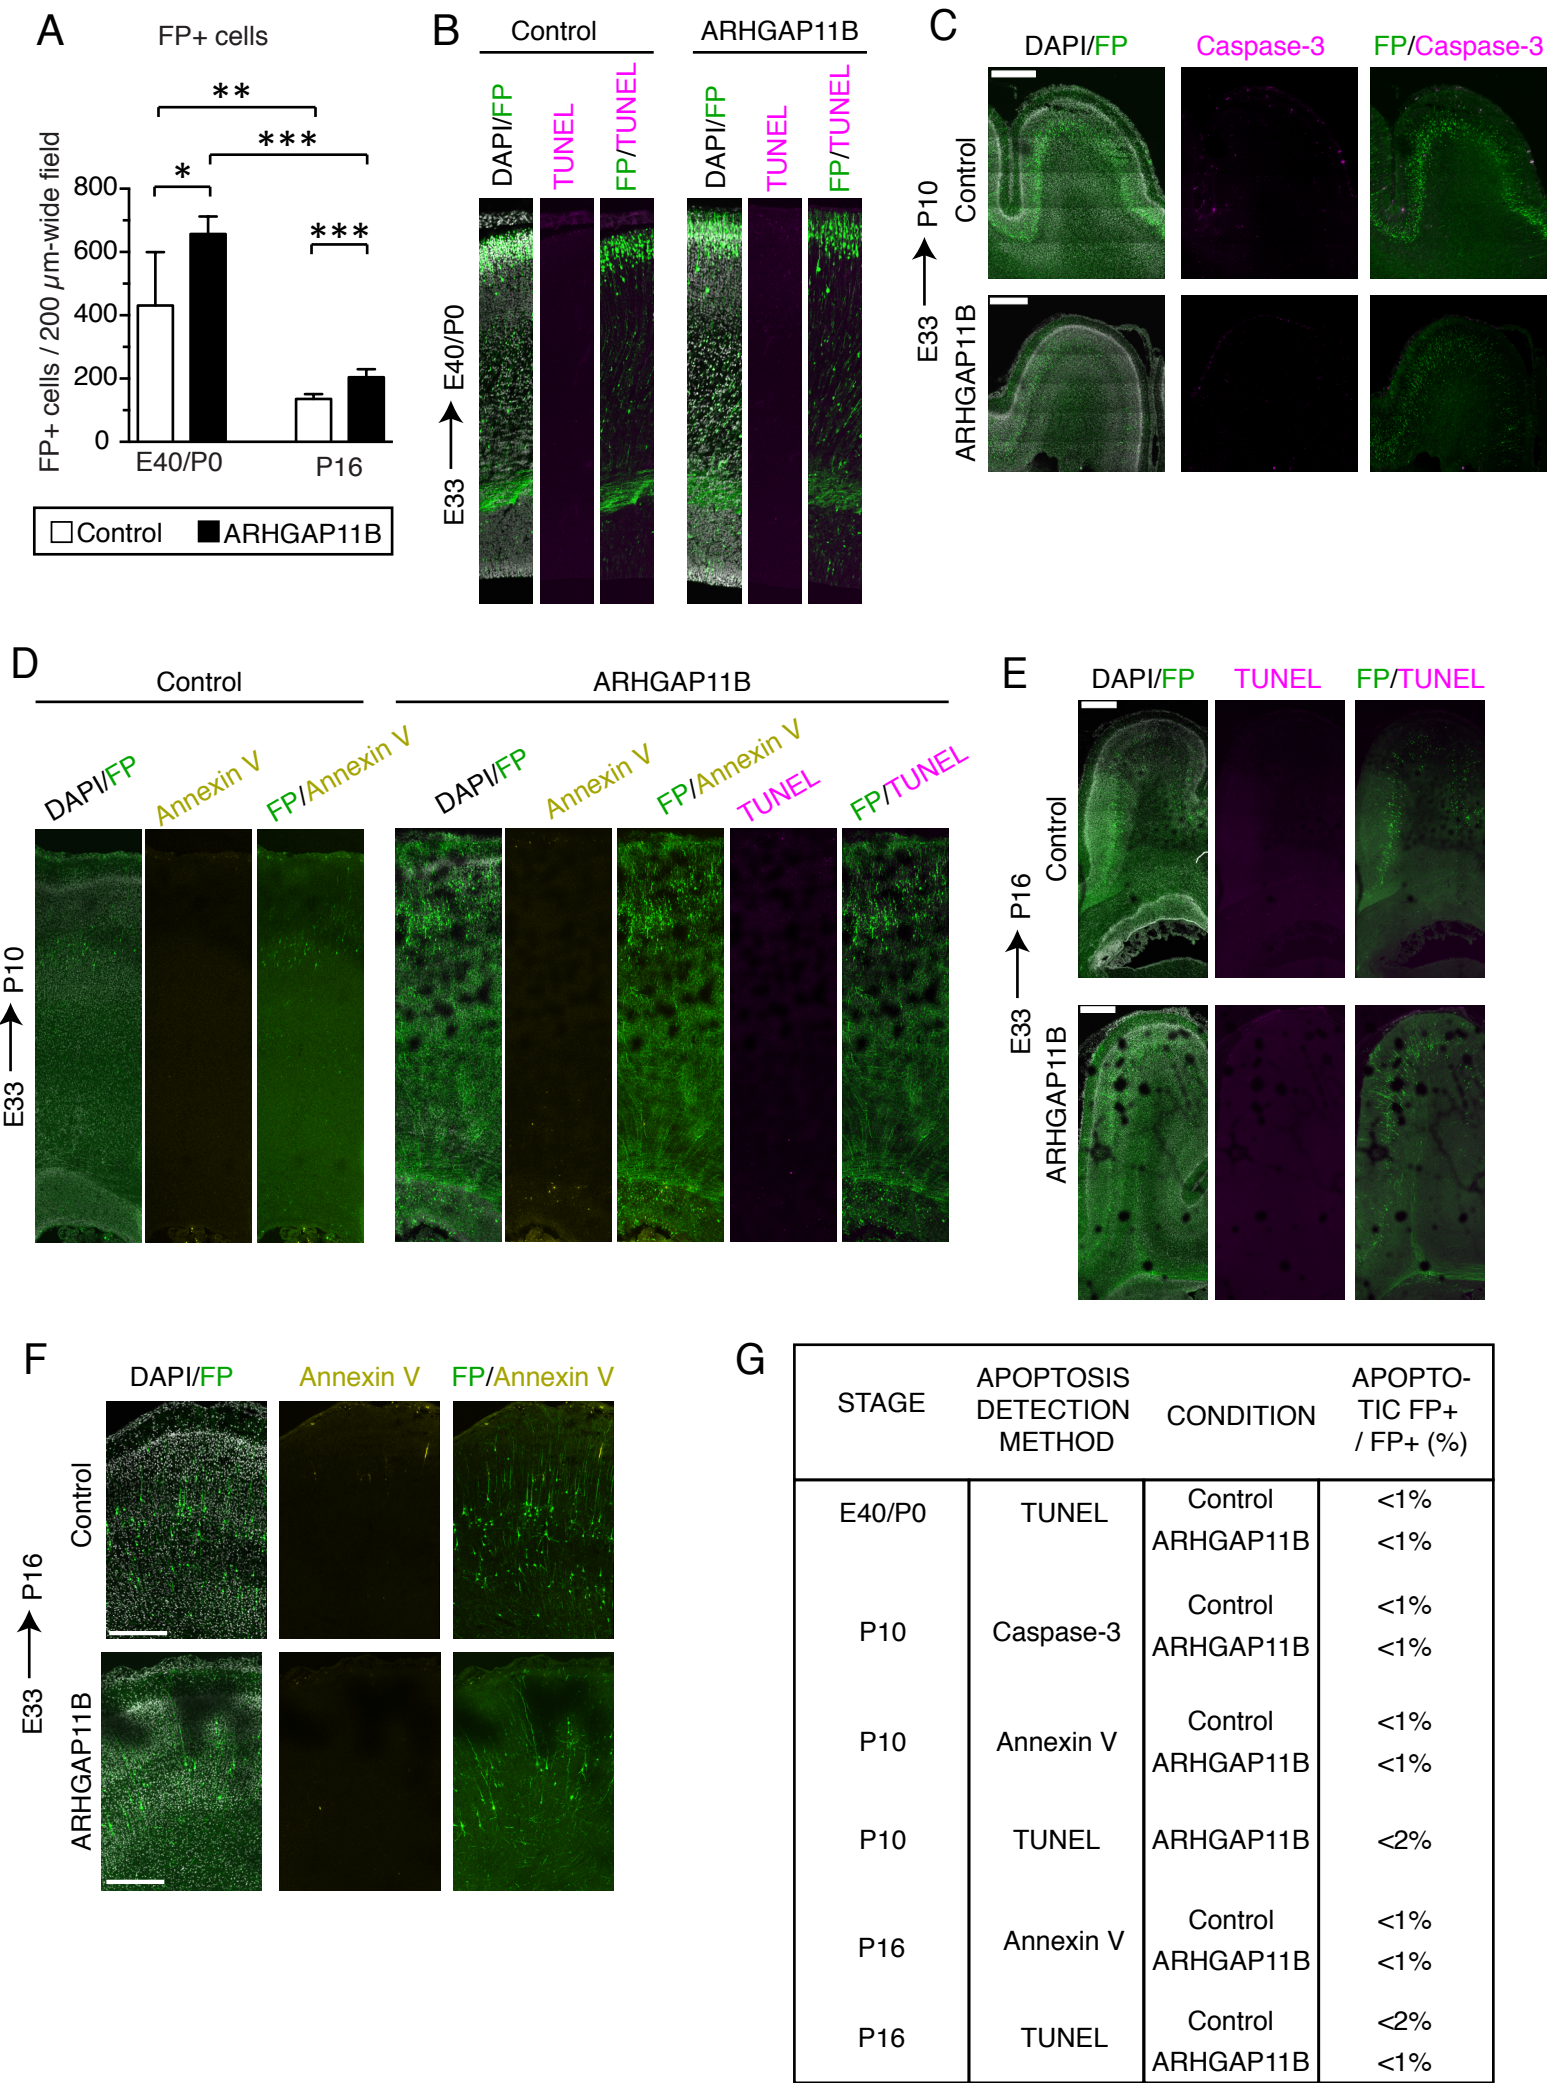

Supplement: supp [file elife_poa_e41241_Figure_4_figure_supplement_4.pdf › elife_poa_e41241_Figure_4_figure_supplement_4.pdf]

Figure 4 supplement 5

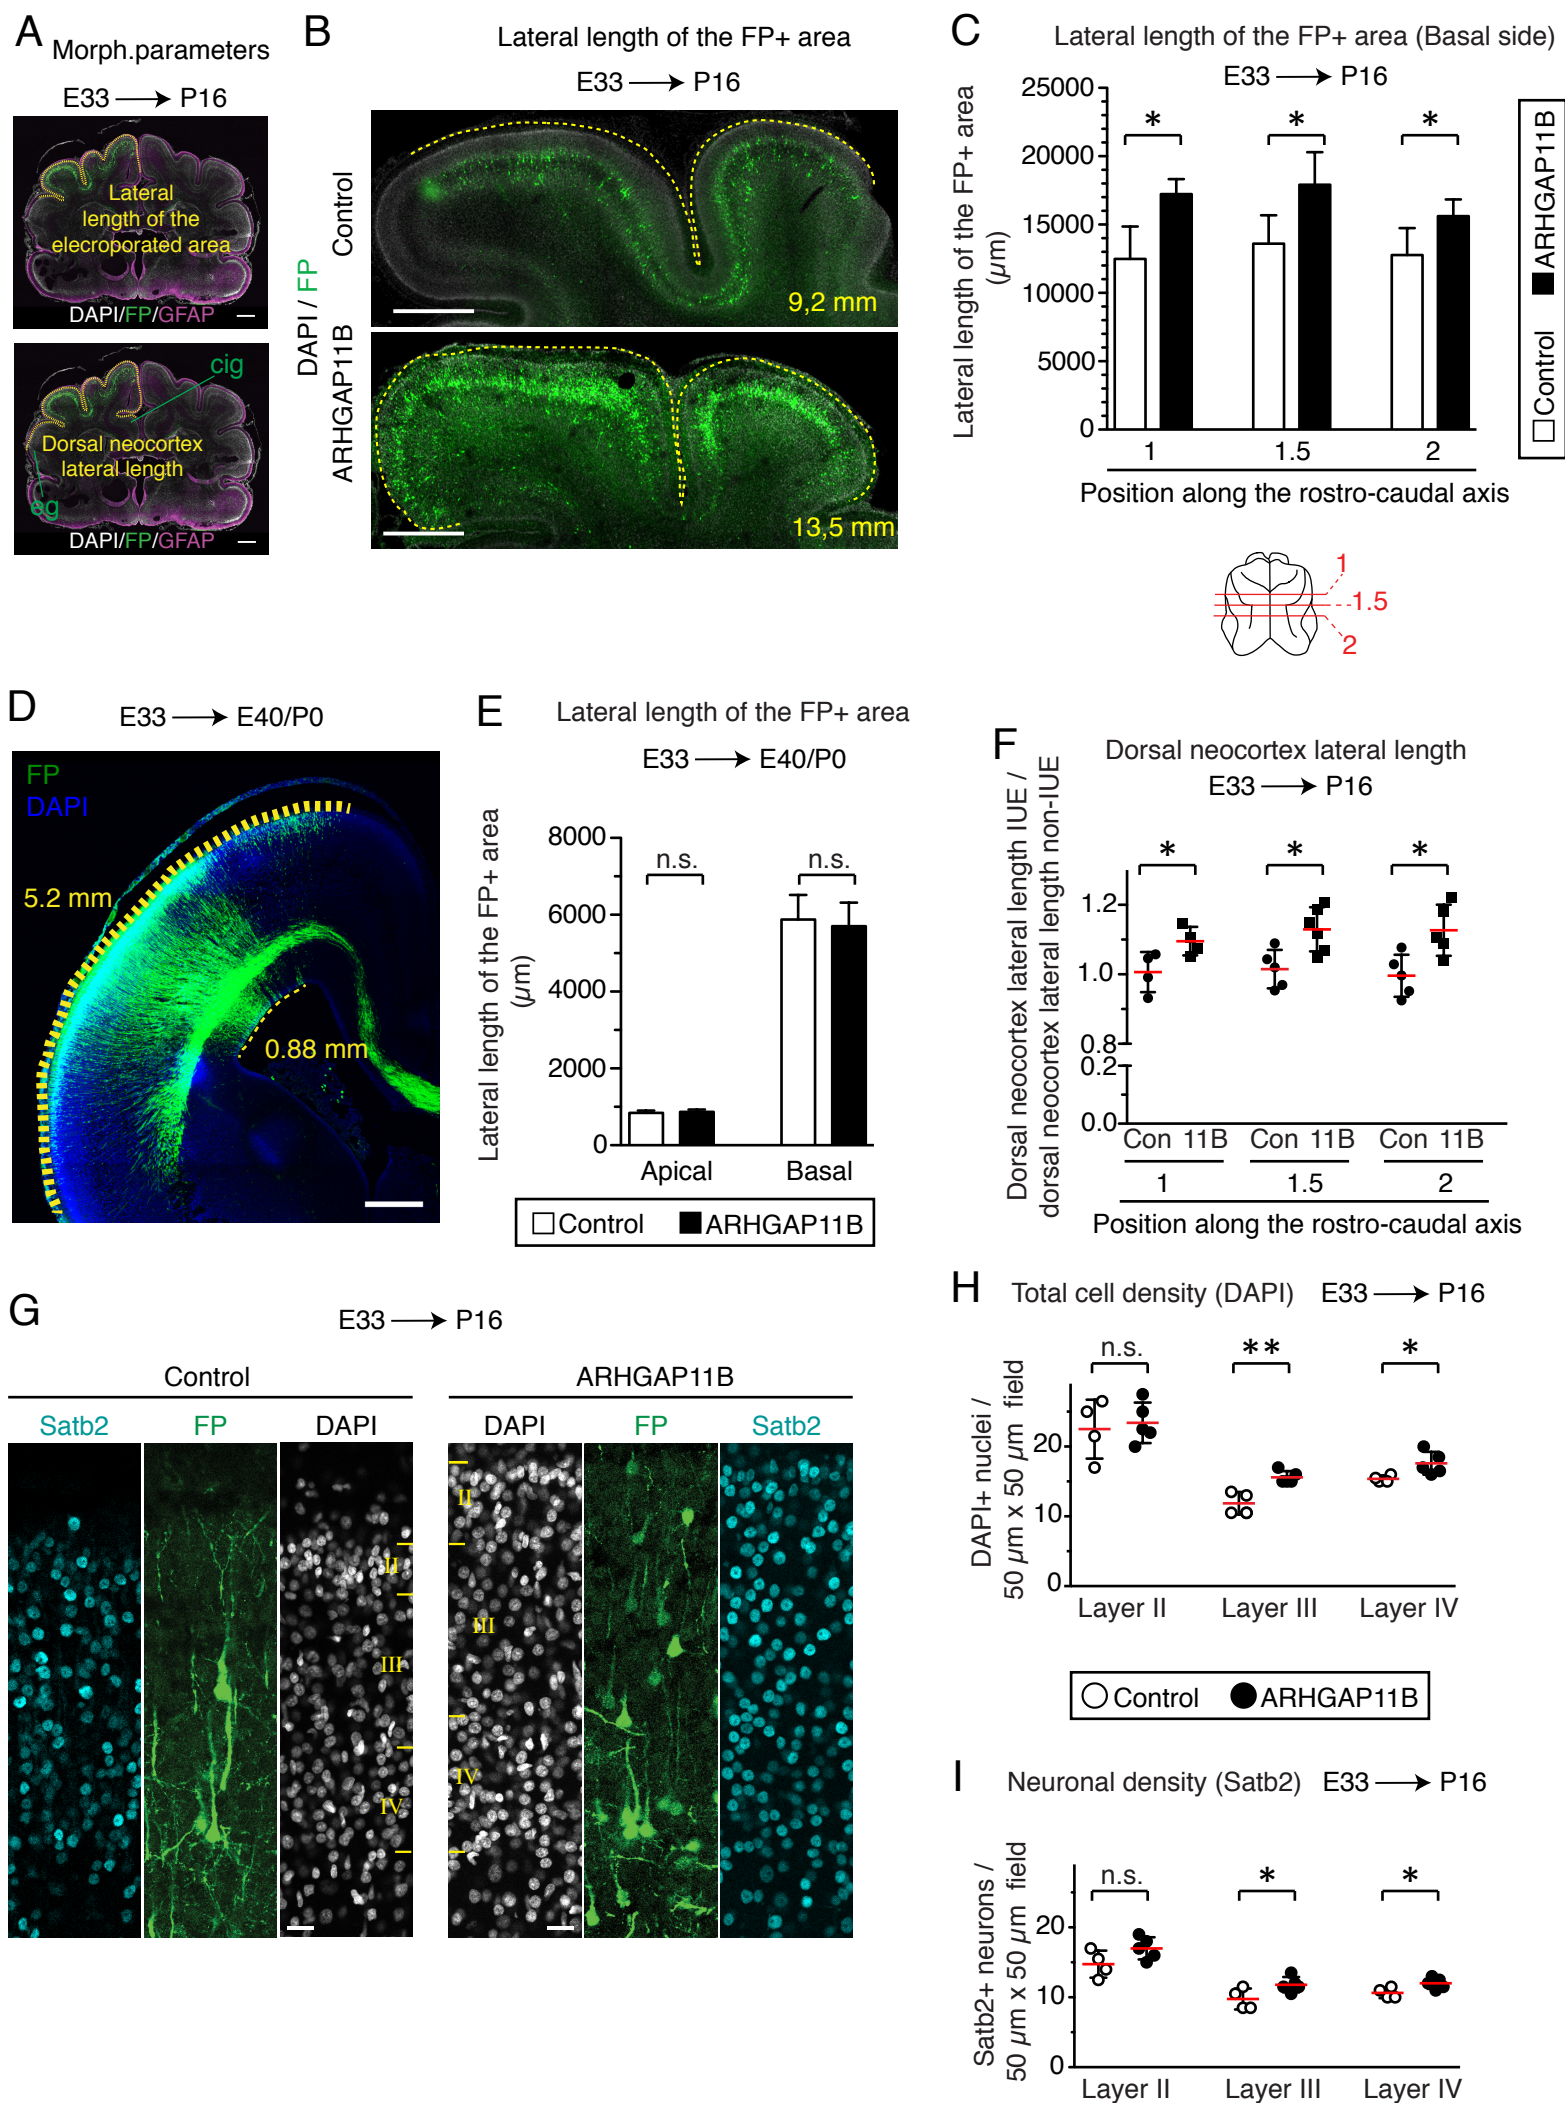

Supplement: supp [file elife_poa_e41241_Figure_4_figure_supplement_5.pdf › elife_poa_e41241_Figure_4_figure_supplement_5.pdf]

Figure 4 supplement 6

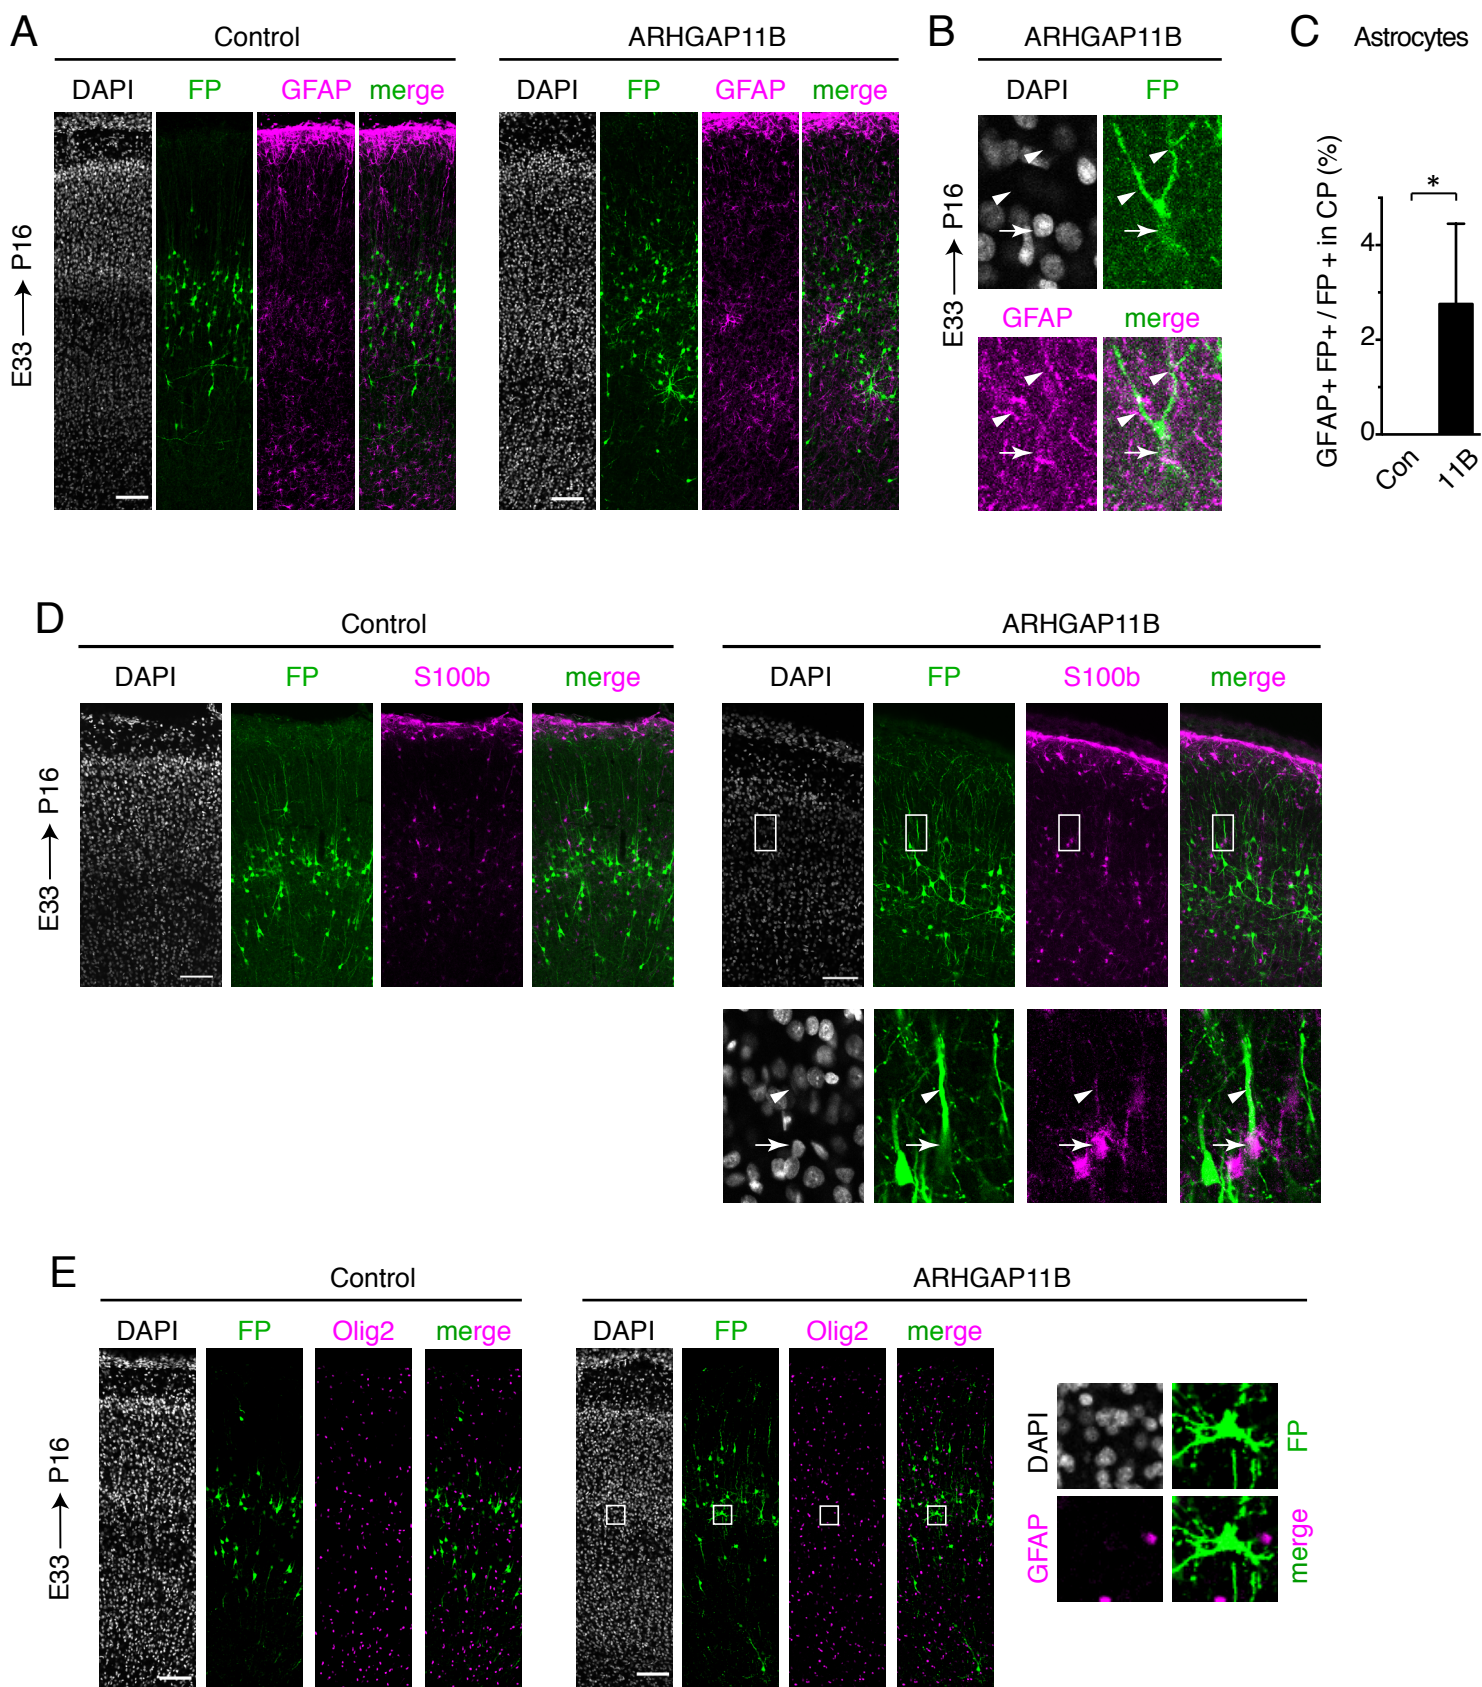

Supplement: supp [file elife_poa_e41241_Figure_4_figure_supplement_6.pdf › elife_poa_e41241_Figure_4_figure_supplement_6.pdf]
